# Supplementary material for: Effectiveness, treatment durability, and treatment costs of canagliflozin and glucagon-like peptide-1 receptor agonists in patients with type 2 diabetes in the USA
Source: PubMed Central journal article supplement — BMJ Open Diabetes Res Care. 2019 Nov 7;7(1):e000704. doi: 10.1136/bmjdrc-2019-000704 (PMC6861096; doi:10.1136/bmjdrc-2019-000704), 2019-11-07
Supplement: bmjdrc-2019-000704supp001.pdf [file bmjdrc-2019-000704supp001.pdf]

**Appendix 1****Supplemental Table 1. Codes**

|                                                          | <b>GPI code/GPI code starts with</b> | <b>ICD-9-CM code</b> | <b>ICD-9-proc code</b> | <b>ICD-10 code<sup>a</sup></b> | <b>HCPCS/CDT</b> | <b>HealthCore clean lab code</b> | <b>HCISpec code</b> |
|----------------------------------------------------------|--------------------------------------|----------------------|------------------------|--------------------------------|------------------|----------------------------------|---------------------|
| AHA medications to identify the primary/secondary cohort |                                      |                      |                        |                                |                  |                                  |                     |
| Canagliflozin                                            |                                      |                      |                        |                                |                  |                                  |                     |
| Canagliflozin 300 mg                                     | 27700020000330                       | –                    | –                      | –                              | –                | –                                | –                   |
| GLP-1                                                    | 271700                               |                      |                        |                                |                  |                                  |                     |
| Albiglutide 30 mg                                        | 2717001000D120                       | –                    | –                      | –                              | –                | –                                | –                   |
| Albiglutide 50 mg                                        | 2717001000D130                       | –                    | –                      | –                              | –                | –                                | –                   |
| Dulaglutide 0.75 mg/0.5 mL                               | 2717001500D220                       | –                    | –                      | –                              | –                | –                                | –                   |
| Dulaglutide 1.5 mg/0.5 mL                                | 2717001500D230                       | –                    | –                      | –                              | –                | –                                | –                   |

|                                                          |                                   |   |   |   |   |   |   |
|----------------------------------------------------------|-----------------------------------|---|---|---|---|---|---|
| Exenatide 5 µg/0.02 mL                                   | 27170020002050,<br>2717002000D220 | – | – | – | – | – | – |
| Exenatide 10 µg/0.04 mL                                  | 27170020002060,<br>2717002000D240 | – | – | – | – | – | – |
| Exenatide 2 mg                                           | 27170020001920,<br>2717002000D120 | – | – | – | – | – | – |
| Exenatide for injection extended release suspension 2 mg | 2717002000G220                    | – | – | – | – | – | – |
| Liraglutide 1.8 mg/3 mL                                  | 27170050002020,<br>2717005000D220 | – | – | – | – | – | – |
| Lixisenatide (ndc 0024-5745-02, 0024-5747-02)            | Not available                     | – | – | – | – | – | – |
| Lixisenatide + insulin glargine (ndc 0024-5761-05)       | Not available                     | – | – | – | – | – | – |
| Other AHAs                                               |                                   |   |   |   |   |   |   |
| Amylin analogues                                         |                                   |   |   |   |   |   |   |

|                                    |            |   |   |   |   |   |   |
|------------------------------------|------------|---|---|---|---|---|---|
| Pramlintide aceate                 | 2715005010 | – | – | – | – | – | – |
| Incretin mimetic agents<br>(GLP-1) |            |   |   |   |   |   |   |
| Albiglutide                        | 2717001000 | – | – | – | – | – | – |
| Dulaglutide                        | 2717001500 | – | – | – | – | – | – |
| Exenatide                          | 2717002000 | – | – | – | – | – | – |
| Liraglutide                        | 2717005000 | – | – | – | – | – | – |
| Sulfonylureas                      |            |   |   |   |   |   |   |
| Acetohexamide                      | 2720001000 | – | – | – | – | – | – |
| Chlorpropamide                     | 2720002000 | – | – | – | – | – | – |
| Tolazamide                         | 2720005000 | – | – | – | – | – | – |
| Tolbutamide                        | 2720006000 | – | – | – | – | – | – |
| Glimepiride                        | 2720002700 | – | – | – | – | – | – |
| Glipizide                          | 2720003000 | – | – | – | – | – | – |
| Glyburide                          | 2720004000 | – | – | – | – | – | – |

|                              |                           |   |   |   |   |   |   |
|------------------------------|---------------------------|---|---|---|---|---|---|
| Glyburide micronized         | 2720004010                | – | – | – | – | – | – |
| Biguanides                   |                           |   |   |   |   |   |   |
| Metformin HCl                | 2725005000                | – | – | – | – | – | – |
| Meglitinide analogues        |                           |   |   |   |   |   |   |
| Nateglinide                  | 2723405000,<br>2728004000 | – | – | – | – | – | – |
| Repaglinide                  | 2728006000                | – | – | – | – | – | – |
| Alpha-glucosidase inhibitors |                           |   |   |   |   |   |   |
| Acarbose                     | 2750001000                | – | – | – | – | – | – |
| Miglitol                     | 2750005000                | – | – | – | – | – | – |
| SGLT2 inhibitors             |                           |   |   |   |   |   |   |
| Canagliflozin                | 27700020                  | – | – | – | – | – | – |
| Dapagliflozin                | 277000402                 | – | – | – | – | – | – |
| Empagliflozin                | 277000500                 |   |   |   |   |   |   |

|                                           |            |   |   |   |   |   |   |
|-------------------------------------------|------------|---|---|---|---|---|---|
| DPP-4 inhibitors                          |            |   |   |   |   |   |   |
| Alogliptin benzoate                       | 2755001010 | – | – | – | – | – | – |
| Linagliptin                               | 2755005000 | – | – | – | – | – | – |
| Saxagliptin HCl                           | 2755006510 | – | – | – | – | – | – |
| Sitagliptin phosphate                     | 2755007010 | – | – | – | – | – | – |
| Dopamine receptor agonists - Antidiabetic | 2757       | – | – | – | – | – | – |
| Insulin sensitizing agents                |            |   |   |   |   |   |   |
| Pioglitazone HCl                          | 2760705010 | – | – | – | – | – | – |
| Rosiglitazone maleate                     | 2760706010 | – | – | – | – | – | – |
| Antidiabetic combinations                 |            |   |   |   |   |   |   |
| Alogliptin-metformin HCl                  | 2799250210 | – | – | – | – | – | – |
| Alogliptin-pioglitazone                   | 2799400210 | – | – | – | – | – | – |

|                                            |              |   |   |   |   |   |   |
|--------------------------------------------|--------------|---|---|---|---|---|---|
| Canagliflozin-metformin<br>HCl             | 279960022003 | - | - | - | - | - | - |
| Canagliflozin-metformin<br>HCl tab SR 24HR | 279960022075 | - | - | - | - | - | - |
| Dapagliflozin-metformin<br>HCl             | 279960023075 | - | - | - | - | - | - |
| Empagliflozin-<br>linagliptin              | 279965023003 | - | - | - | - | - | - |
| Empagliflozin-<br>metformin HCl            | 279960024003 | - | - | - | - | - | - |
| Glipizide-metformin<br>HCl                 | 2799700235   | - | - | - | - | - | - |
| Glyburide-metformin                        | 2799700240   | - | - | - | - | - | - |
| Linagliptin-metformin<br>HCl               | 2799250240   | - | - | - | - | - | - |
| Linagliptin-metformin<br>HCl               | 279925024075 | - | - | - | - | - | - |

|                                          |              |   |   |   |   |   |   |
|------------------------------------------|--------------|---|---|---|---|---|---|
| Metformin HCl-dietary management product | 2799900250   | - | - | - | - | - | - |
| Pioglitazone HCl-glimepiride             | 2799780240   | - | - | - | - | - | - |
| Pioglitazone HCl-metformin HCl           | 2799800240   | - | - | - | - | - | - |
| Repaglinide-metformin HCl                | 279950027003 | - | - | - | - | - | - |
| Rosiglitazone maleate-glimepiride        | 2799780260   | - | - | - | - | - | - |
| Rosiglitazone maleate-metformin HCl      | 2799800260   | - | - | - | - | - | - |
| Saxagliptin-metformin HCl                | 2799250260   | - | - | - | - | - | - |
| Sitagliptin-metformin HCl                | 2799250270   | - | - | - | - | - | - |
| Sitagliptin-simvastatin                  | 2799300270   | - | - | - | - | - | - |

|                                          |              |   |   |   |              |   |   |
|------------------------------------------|--------------|---|---|---|--------------|---|---|
| Saxagliptin-metformin<br>HCl tab SR 24HR | 279925026075 | - | - | - | -            | - | - |
| Sitagliptin-metformin<br>HCl tab SR 24HR | 279925027075 | - | - | - | -            | - | - |
| Diabetic other                           |              |   |   |   |              |   |   |
| Dextrose (diabetic use)                  | 2730003000   | - | - | - | -            | - | - |
| Diazoxide                                | 2730002000   | - | - | - | -            | - | - |
| Glucagon                                 | 2730001000   | - | - | - | -            | - | - |
| Glucagon (rDNA)                          | 2730001010   | - | - | - | -            | - | - |
| Glucagon HCl (rDNA)                      | 2730001015   | - | - | - | -            | - | - |
| Glucose-vitamin C                        | 2730990240   | - | - | - | -            | - | - |
| Mifepristone<br>(hyperglycemia)          | 2730405000   | - | - | - | -            | - | - |
| Insulin                                  | 2710         | - | - | - | -            | - | - |
| Rapid acting                             |              | - | - | - | S5550- S5551 | - | - |



|                                                  |                                                              |   |   |   |       |   |   |
|--------------------------------------------------|--------------------------------------------------------------|---|---|---|-------|---|---|
| Lispro (Humalog)                                 | 27104005                                                     | – | – | – | –     | – | – |
| Glulisine (Novolog)                              | 27104004                                                     | – | – | – | –     | – | – |
| Aspart (Apidra)                                  | 27104002                                                     | – | – | – | –     | – | – |
| Short acting                                     |                                                              |   |   |   |       |   |   |
| Regular (R) - Humulin<br>/ Novolin / Velosulin   | 27101010,<br>27102010,<br>27103010,<br>27104010,<br>27104015 | – | – | – | –     | – | – |
| Intermediate acting                              |                                                              | – | – | – | S5552 | – | – |
| NPH (N) – Intelin I /<br>Intelin II / Insulatard | 27101020,<br>27102020,<br>27103020,<br>27104020              | – | – | – | –     | – | – |
| Long acting                                      |                                                              | – | – | – | S5553 | – | – |
| Lantus (insulin<br>glargine)                     | 27104003                                                     | – | – | – | –     | – | – |

|                              |          |                                        |   |        |       |   |   |
|------------------------------|----------|----------------------------------------|---|--------|-------|---|---|
| Levemir (insulin detemir)    | 27104006 | –                                      | – | –      | –     | – | – |
| Mix                          |          |                                        |   |        |       |   |   |
| Humalog mix                  | 27104080 | –                                      | – | –      | –     | – | – |
| Novolog mix                  | 27104070 | –                                      | – | –      | –     | – | – |
| Humulin or Novolin mix       | 27104090 | –                                      | – | –      | –     | – | – |
| Codes for diabetes           |          |                                        |   |        |       |   |   |
| T2DM                         | –        | 250.x0,<br>250.x2                      | – | E11.%  | –     | – | – |
| T1DM                         | –        | 250.x1,<br>250.x3                      | – | E10.%  | –     | – | – |
| Gestational DM and pregnancy | –        | 648.8,<br>V22.xx-<br>V24.xx,<br>V28.xx | – | O24.4% | S9214 | – | – |

|                                  |   |                                              |   |                                             |   |   |   |
|----------------------------------|---|----------------------------------------------|---|---------------------------------------------|---|---|---|
| Steroid induced diabetes         | – | 249.xx and<br>E932.0 on<br>the same<br>claim | – | E09.% and<br>T38.0% on<br>the same<br>claim | – | – | – |
| Codes for comorbid<br>conditions |   |                                              |   |                                             |   |   |   |
| Cardiovascular                   |   |                                              |   |                                             |   |   |   |
| Ischemic stroke                  | – | 433.x1,<br>434.x1                            | – | I63.%                                       | – | – | – |
| Acute myocardial<br>infarction   | – | 410.xx,<br>412.xx                            | – | I21.%,<br>I22.%                             | – | – | – |
| Atrial fibrillation              | – | 427.31                                       | – | I48.0 -<br>I48.2,<br>I48.89,<br>I48.91      | – | – | – |
| Peripheral artery disease        | – | –                                            | – | I70.2%,<br>I70.3%,<br>I70.4%,<br>I70.5%,    | – | – | – |

|                          |   |                                                                                                 |   |                                        |   |   |   |
|--------------------------|---|-------------------------------------------------------------------------------------------------|---|----------------------------------------|---|---|---|
|                          |   |                                                                                                 |   | 170.6%,<br>170.7%                      |   |   |   |
| Carotid artery disease   | – | 433.x1,<br>434.01,<br>434.11,<br>434.91,<br>435.xx,<br>362.34                                   | – | 172.0%,<br>165.2%                      | – | – | – |
| Abdominal aortic disease | – | 441.02,<br>441.3x,<br>441.4x                                                                    | – | 170.0, 171.%                           | – | – | – |
| Congestive heart failure | – | 398.91,<br>402.01,<br>402.11,<br>402.91,<br>404.01,<br>404.03,<br>404.11,<br>404.13,<br>404.91, | – | 150.%,<br>111.0%,<br>113.0%,<br>113.2% | – | – | – |

|                             |   |                                                                                                                       |   |                                                                                                                                  |   |   |   |
|-----------------------------|---|-----------------------------------------------------------------------------------------------------------------------|---|----------------------------------------------------------------------------------------------------------------------------------|---|---|---|
|                             |   | 404.93,<br>428.x                                                                                                      |   |                                                                                                                                  |   |   |   |
| Ventricular arrhythmia      | – | 427.4                                                                                                                 | – | I47.0, I47.2,<br>I49.0%                                                                                                          | – | – | – |
| Angina                      | – | 413.x,<br>414.x                                                                                                       | – | I20.%                                                                                                                            | – | – | – |
| Microvascular complications |   |                                                                                                                       |   |                                                                                                                                  |   |   |   |
| Neuropathy                  | – | 356.9,<br>250.6,<br>358.1,<br>951.0,<br>951.1,<br>951.3,<br>354.0-<br>355.9,<br>713.5,<br>357.2,<br>596.54,<br>337.0, | – | E08.40,<br>E08.41,<br>E08.42,<br>E08.43,<br>E10.40,<br>E10.42,<br>E10.43,<br>E11.40,<br>E11.41,<br>E11.42,<br>E11.43,<br>E13.40, | – | – | – |

|             |   |                                                                                                                                   |   |                                                                                                   |   |   |   |
|-------------|---|-----------------------------------------------------------------------------------------------------------------------------------|---|---------------------------------------------------------------------------------------------------|---|---|---|
|             |   | 337.1,<br>564.5,<br>536.3,<br>458.0                                                                                               |   | E13.41,<br>E13.42,<br>E13.43                                                                      |   |   |   |
| Retinopathy | – | 250.5x,<br>362.01,<br>362.1,<br>362.83,<br>362.53,<br>362.81,<br>362.82,<br>362.02,<br>361.xx,<br>369.xx,<br>0.00-0.99,<br>379.23 | – | E08.32% -<br>E08.3599,<br>E10.32 -<br>E10.3599,<br>E11.32 -<br>E11.3599,<br>E13.32% -<br>E13.3599 | – | – | – |
| Nephropathy | – | 250.4, 580,<br>581-583,<br>585, 586,<br>593.9                                                                                     | – | E08.2%,<br>E10.2%,<br>E11.2%,<br>E13.2%                                                           | – | – | – |

|                    |   |                                                                                                           |   |                                               |   |   |   |
|--------------------|---|-----------------------------------------------------------------------------------------------------------|---|-----------------------------------------------|---|---|---|
| Other conditions   |   |                                                                                                           |   |                                               |   |   |   |
| Hypertension       | – | 401.xx,<br>402.00,<br>402.10,<br>403.xx,<br>404.00,<br>404.02,<br>404.10,<br>404.12,<br>404.90,<br>404.92 | – | I16.%,<br>I10.%,<br>I11.%,<br>I12.%,<br>I13.% | – | – | – |
| Dyslipidemia       | – | 272.xx                                                                                                    | – | E78.0 -<br>E78.5                              | – | – | – |
| Anxiety/depression | – | 296.2x-<br>296.3x,<br>298.0,<br>300.0x,<br>300.2x,<br>300.4x,<br>309.0x-<br>309.1x,                       | – | F32 - F32.5,<br>F33.%,<br>F41.1%              | – | – | – |

|                        |   |                                                                            |                                                |                                             |                                                                                                    |   |   |
|------------------------|---|----------------------------------------------------------------------------|------------------------------------------------|---------------------------------------------|----------------------------------------------------------------------------------------------------|---|---|
|                        |   | 309.28,<br>311.xx                                                          |                                                |                                             |                                                                                                    |   |   |
| Back pain              | – | 724.5x                                                                     | –                                              | M54.4%,<br>M54.5                            | –                                                                                                  | – | – |
| Obesity                | – | 270.0x,<br>V85.3x,<br>V85.4x                                               | –                                              | E66.%,<br>Z68.3%,<br>Z68.4%                 | –                                                                                                  | – | – |
| Cancer                 | – | 140.xx -<br>172.xx,<br>174.xx -<br>195.xx,<br>200.xx-<br>208.xx,<br>238.6x | –                                              | C02.% -<br>C4A.9%,<br><br>C45.% -<br>C96.9% | –                                                                                                  | – | – |
| Solid organ transplant | – | –                                                                          | 52.8x,<br>50.5x,<br>37.51,<br>33.5x,<br>33.6x, | –                                           | 50360, 50365,<br>48554, 47135,<br>47136, 33945,<br>33935, 32851,<br>32852, 32853,<br>32854, 44135, | – | – |



|                           |   |                   |                 |        |                                            |   |   |
|---------------------------|---|-------------------|-----------------|--------|--------------------------------------------|---|---|
|                           |   |                   | 46.97,<br>55.69 |        | 44136,<br>S2065,<br>S2060,<br>S2053, S2054 |   |   |
| Chronic kidney disease    |   |                   |                 |        |                                            |   |   |
| Stage 1                   | – | 585.1x            | –               | N18.1% | –                                          | – | – |
| Stage 2                   | – | 585.2x            | –               | N18.2% | –                                          | – | – |
| Stage 3                   | – | 585.3x            | –               | N18.3% | –                                          | – | – |
| Stage 4                   | – | 585.4x            | –               | N18.4% | –                                          | – | – |
| Stage 5                   | – | 585.5x            | –               | N18.5% | –                                          | – | – |
| ESRD                      | – | 585.6x            | –               | N18.6% | –                                          | – | – |
| CKD unspecified           | – | 585.9x,<br>403.xx | –               | N18.9% | –                                          | – | – |
| HbA1c test                | – | –                 | –               | –      | –                                          | 1 | – |
| Physician specialty codes | – | –                 | –               | –      | –                                          | – | – |

|                                                                                                                                                                                                                                                                                                                 |   |   |   |   |   |   |                                       |
|-----------------------------------------------------------------------------------------------------------------------------------------------------------------------------------------------------------------------------------------------------------------------------------------------------------------|---|---|---|---|---|---|---------------------------------------|
| Endocrinology/metabolism                                                                                                                                                                                                                                                                                        | – | – | – | – | – | – | 6                                     |
| Cardiology                                                                                                                                                                                                                                                                                                      | – | – | – | – | – | – | 3                                     |
| Internal Medicine                                                                                                                                                                                                                                                                                               | – | – | – | – | – | – | 12                                    |
| Family/General Practice                                                                                                                                                                                                                                                                                         | – | – | – | – | – | – | 7                                     |
| Other (Non-physician)                                                                                                                                                                                                                                                                                           | – | – | – | – | – | – | 19                                    |
| Other<br>(Allergy/Immunology,<br>Anesthesiology/Pain<br>Management,<br>Dermatology, Emergency<br>Medicine,<br>Gastroenterology,<br>Geriatrics, Hematology,<br>Infectious Disease,<br>Nephrology, Neurology,<br>Nuclear Medicine,<br>Obstetrics/Gynecology,<br>Oncology,<br>Ophthalmology, Other<br>[Physician], | – | – | – | – | – | – | 1, 2, 4, 5,<br>8-11, 13-<br>18, 20-31 |

|                                                                                                                                                                                                               |  |  |  |  |  |  |  |
|---------------------------------------------------------------------------------------------------------------------------------------------------------------------------------------------------------------|--|--|--|--|--|--|--|
| Otolaryngology,<br>Pathology, Pediatrics [all<br>types], Physical<br>Medicine/Rehabilitation,<br>Podiatry, Psychiatry,<br>Pulmonary Medicine,<br>Radiology, Rheumatology,<br>Surgery [all types],<br>Urology) |  |  |  |  |  |  |  |
|---------------------------------------------------------------------------------------------------------------------------------------------------------------------------------------------------------------|--|--|--|--|--|--|--|

AHA, antihyperglycemic agents; CDT, Current Dental Terminology; CKD, chronic kidney disease; DM, diabetes mellitus; DPP-4, dipeptidyl peptidase-4; ESRD, end-stage renal disease; GLP-1, glucagon-like peptide-1 receptor agonist; GPI, general product identifier; HCPCS, Healthcare Common Procedure Coding System; HCISpec, Health Core Information Specialty; ICD-9-CM, *International Classification of Disease, Ninth Revision Clinical Modification*; ICD-9-proc, *International Classification of Disease, Ninth Revision Procedures*; ICD-10, *International Classification of Disease, Tenth Revision*; SGLT2, sodium glucose co-transporter 2; T1DM, type 1 diabetes mellitus; T2DM, type 2 diabetes mellitus.

<sup>a</sup>Percentage signs represent placeholders.

Supplemental Table 2. Demographic and Clinical Characteristics

|                             | Before Inverse Probability of Treatment Weighting |                                          |                                   | After Inverse Probability of Treatment Weighting |                                          |                                   |
|-----------------------------|---------------------------------------------------|------------------------------------------|-----------------------------------|--------------------------------------------------|------------------------------------------|-----------------------------------|
|                             | Any dose of                                       |                                          |                                   | Any dose of                                      |                                          |                                   |
|                             | Canagliflozin<br>300 mg<br>(n = 755)              | GLP-1 receptor<br>agonist<br>(n = 2,416) | Absolute<br>std diff <sup>a</sup> | Canagliflozin<br>300 mg<br>(n = 750)             | GLP-1 receptor<br>agonist<br>(n = 2,417) | Absolute<br>std diff <sup>a</sup> |
| Comorbidities, n (%)        |                                                   |                                          |                                   |                                                  |                                          |                                   |
| Cardiovascular              |                                                   |                                          |                                   |                                                  |                                          |                                   |
| Ischemic stroke             | 0 (0.0)                                           | ≤10                                      | 4%                                | 0 (0.0)                                          | ≤10                                      | 4%                                |
| Acute myocardial infarction | 12 (1.6)                                          | 44 (1.8)                                 | 2%                                | 16 (2.2)                                         | 44 (1.8)                                 | 3%                                |
| Atrial fibrillation         | 22 (2.9)                                          | 56 (2.3)                                 | 4%                                | 16 (2.2)                                         | 58 (2.4)                                 | 2%                                |
| Peripheral artery disease   | 25 (3.3)                                          | 85 (3.5)                                 | 1%                                | 24 (3.2)                                         | 84 (3.5)                                 | 1%                                |
| Carotid artery disease      | ≤10                                               | 33 (1.4)                                 | 4%                                | ≤10                                              | 30 (1.2)                                 | 1%                                |
| Abdominal aortic aneurysm   | ≤10                                               | 12 (0.5)                                 | 7%                                | ≤10                                              | ≤10                                      | 4%                                |
| Heart failure               | 11 (1.5)                                          | 57 (2.4)                                 | 7%                                | 16 (2.1)                                         | 52 (2.2)                                 | 0%                                |
| Ventricular arrhythmia      | 0 (0.0)                                           | ≤10                                      | 4%                                | 0 (0.0)                                          | ≤10                                      | 4%                                |
| Angina                      | 70 (9.3)                                          | 246 (10.2)                               | 3%                                | 79 (10.6)                                        | 243 (10.0)                               | 2%                                |
| Microvascular complications |                                                   |                                          |                                   |                                                  |                                          |                                   |
| Neuropathy                  | 104 (13.8)                                        | 387 (16.0)                               | 6%                                | 117 (15.6)                                       | 376 (15.5)                               | 0%                                |
| Retinopathy                 | 120 (15.9)                                        | 399 (16.5)                               | 2%                                | 120 (16.1)                                       | 396 (16.4)                               | 1%                                |
| Nephrology                  | 37 (4.9)                                          | 119 (4.9)                                | 0%                                | 38 (5.1)                                         | 119 (4.9)                                | 1%                                |

|                                                          |            |              |     |            |              |    |
|----------------------------------------------------------|------------|--------------|-----|------------|--------------|----|
| Other comorbid conditions                                |            |              |     |            |              |    |
| Hypertension                                             | 590 (78.1) | 1,868 (77.3) | 2%  | 586 (78.2) | 1,873 (77.5) | 2% |
| Dyslipidemia                                             | 634 (84.0) | 1,998 (82.7) | 3%  | 630 (84.0) | 2,007 (83.1) | 3% |
| Anxiety/depression                                       | 101 (13.4) | 477 (19.7)   | 17% | 137 (18.2) | 440 (18.2)   | 0% |
| Back pain                                                | 42 (5.6)   | 149 (6.2)    | 3%  | 49 (6.5)   | 146 (6.1)    | 2% |
| Obesity                                                  | 78 (10.3)  | 319 (13.2)   | 9%  | 93 (12.5)  | 302 (12.5)   | 0% |
| Liver disease                                            | 51 (6.8)   | 147 (6.1)    | 3%  | 44 (5.9)   | 150 (6.2)    | 1% |
| Prescribing physician on index date <sup>b</sup> , n (%) |            |              |     |            |              |    |
| Endocrinology                                            | 161 (21.3) | 601 (24.9)   | 8%  | 186 (24.8) | 585 (24.2)   | 1% |
| Cardiology                                               | ≤10        | 23 (1.0)     | 3%  | ≤10        | 21 (0.9)     | 1% |
| Family medicine/general practitioner                     | 415 (55.0) | 1,225 (50.7) | 9%  | 376 (50.2) | 1,245 (51.5) | 3% |
| Physician assistant/nurse practitioner                   | 94 (12.5)  | 386 (16.0)   | 10% | 117 (15.5) | 366 (15.1)   | 1% |
| Other                                                    | 77 (10.2)  | 152 (6.3)    | 14% | 57 (7.6)   | 178 (7.4)    | 1% |
| AHA use, n (%)                                           |            |              |     |            |              |    |
| Amylin analogues (pramlintide acetate)                   | ≤10        | ≤10          | 2%  | ≤10        | ≤10          | 2% |
| Sulfonylureas,                                           | 360 (47.7) | 902 (37.3)   | 21% | 300 (40.0) | 965 (39.9)   | 0% |
| First generation <sup>c</sup>                            | 0 (0.0)    | 0 (0.0)      | 0%  | 0 (0.0)    | 0 (0.0)      | 0% |
| Second generation <sup>d</sup>                           | 360 (47.7) | 902 (37.3)   | 21% | 300 (40.0) | 965 (39.9)   | 0% |
| Biguanides (metformin HCl)                               | 599 (79.3) | 1,999 (82.7) | 9%  | 617 (82.3) | 1,982 (82.0) | 1% |
| Meglitinide analogues                                    | ≤10        | 32 (1.3)     | 1%  | ≤10        | 31 (1.3)     | 1% |
| Nateglinide                                              | ≤10        | 15 (0.6)     | 1%  | ≤10        | 15 (0.6)     | 1% |
| Repaglinide                                              | ≤10        | 17 (0.7)     | 1%  | ≤10        | 17 (0.7)     | 1% |

|                              |            |            |     |            |            |    |
|------------------------------|------------|------------|-----|------------|------------|----|
| Alpha-glucosidase inhibitors | ≤10        | ≤10        | 3%  | ≤10        | 12 (0.5)   | 1% |
| Acarbose                     | ≤10        | ≤10        | 4%  | ≤10        | 11 (0.5)   | 1% |
| Miglitol                     | 0 (0.0)    | ≤10        | 3%  | 0 (0.0)    | ≤10        | 3% |
| DPP-4 inhibitors             | 383 (50.7) | 815 (33.7) | 35% | 299 (39.8) | 914 (37.8) | 4% |
| Alogliptin                   | ≤10        | 14 (0.6)   | 1%  | ≤10        | 13 (0.6)   | 2% |
| Linagliptin                  | 49 (6.5)   | 96 (4.0)   | 11% | 33 (4.4)   | 110 (4.6)  | 1% |
| Saxagliptin                  | 61 (8.1)   | 126 (5.2)  | 12% | 48 (6.4)   | 143 (5.9)  | 2% |
| Sitagliptin                  | 281 (37.2) | 602 (24.9) | 27% | 222 (29.6) | 678 (28.0) | 3% |
| Thiazolidinediones           | 73 (9.7)   | 259 (10.7) | 3%  | 83 (11.1)  | 254 (10.5) | 2% |
| Pioglitazone HCl             | 73 (9.7)   | 259 (10.7) | 3%  | 83 (11.1)  | 254 (10.5) | 2% |
| Rosiglitazone maleate        | 0 (0.0)    | 0 (0.0)    | 0%  | 0 (0.0)    | 0 (0.0)    | 0% |
| Diabetic others <sup>e</sup> | 0 (0.0)    | ≤10        | 4%  | 0 (0.0)    | 2 (0.1)    | 4% |
| Insulin                      | 143 (18.9) | 508 (21.0) | 5%  | 162 (21.6) | 504 (20.9) | 2% |
| Rapid or short acting        | 64 (8.5)   | 175 (7.2)  | 5%  | 55 (7.3)   | 181 (7.5)  | 1% |
| Intermediate or long acting  | 126 (16.7) | 455 (18.8) | 6%  | 149 (19.8) | 446 (18.5) | 3% |
| Mix                          | 18 (2.4)   | 59 (2.4)   | 0%  | 18 (2.4)   | 60 (2.5)   | 0% |

AHA, antihyperglycemic agent; DPP-4, dipeptidyl peptidase-4; GLP-1, glucagon-like peptide-1; SD, standard deviation; std diff, standardized difference.

<sup>a</sup>Absolute std diff >10% is considered significant.

<sup>b</sup>Prescribing physician of index medication.

<sup>c</sup>Includes acetohexamide, chlorpropamide, tolazamide, and tolbutamide.

<sup>d</sup>Includes glimepiride, glipizide, glyburide, and glyburide micronized.

<sup>e</sup>Includes dextrose, bromocriptine, diazoxide, glucagon, glucagon (rDNA), glucagon HCl (rDNA), glucose-vitamin C, mifepristone (hyperglycemia), metformin HCl – dietary management product, aldose reductase inhibitors.

**Supplemental Figure 1. Patient disposition.**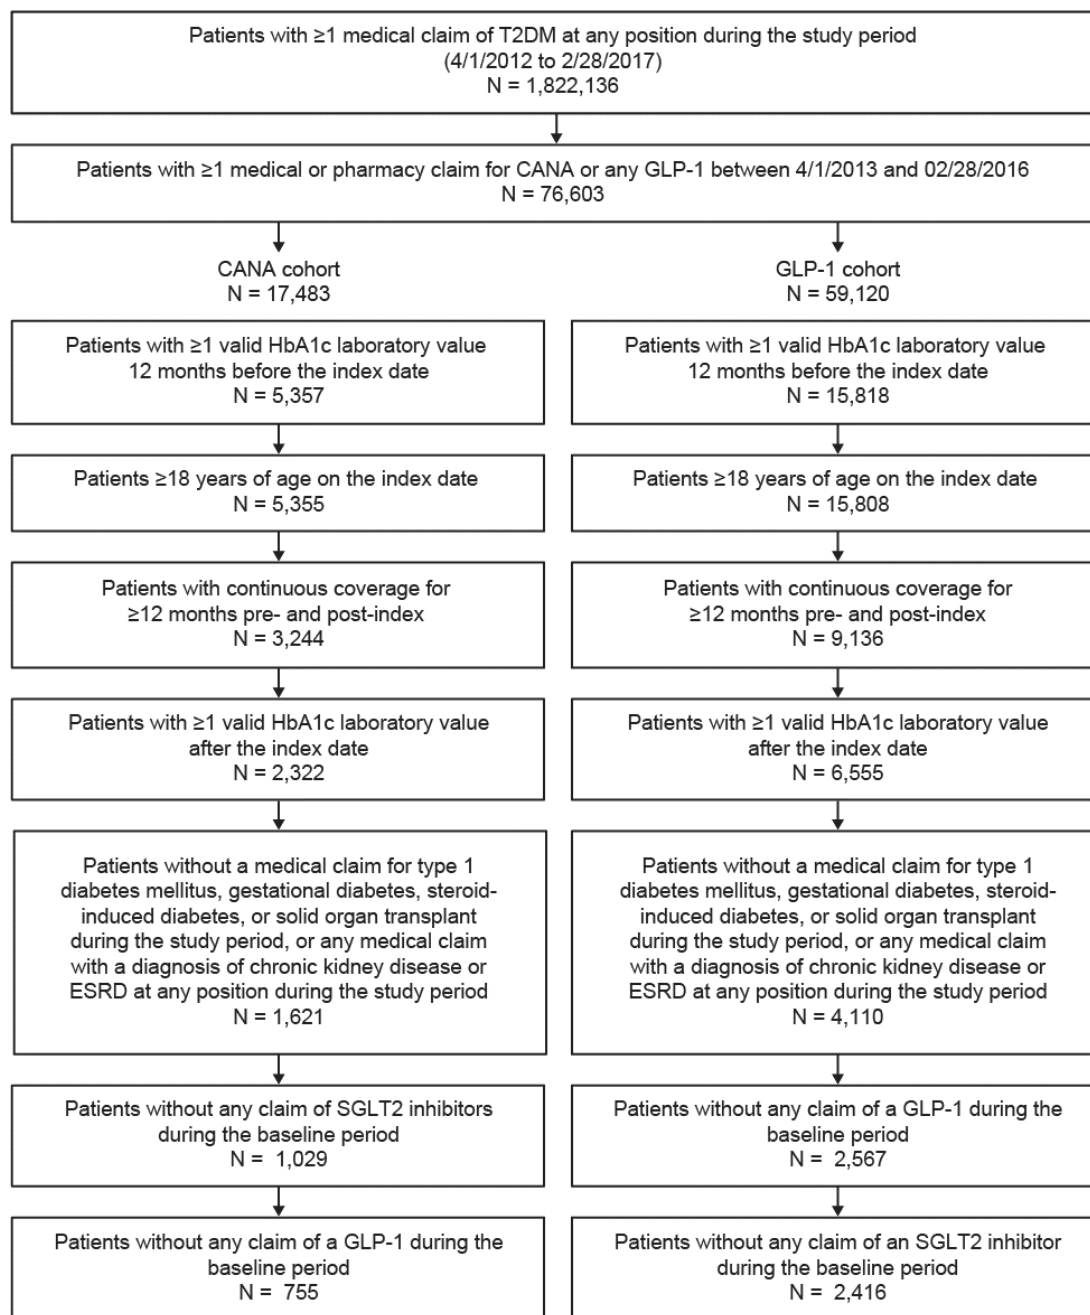

CANA, canagliflozin 300 mg; ESRD, end-stage renal disease; GLP-1, any dose of a glucagon-like peptide-1 receptor agonist; SGLT2, sodium glucose co-transporter 2; T2DM, type 2 diabetes mellitus.
